# Supplementary material
Source: publisher figshare collection journal article supplement (https://gsajournals.figshare.com/ndownloader/files/27005567)
Supplement: Supplementary file 1 [file 27005567]

**SUPPLEMENTARY REFERENCE LIST**

Figure S3:

(Warde-Farley *et al.*, 2010; Calderone *et al.*, 2013; Orchard *et al.*, 2014; Rolland *et al.*, 2014; Oughtred *et al.*, 2018; Szklarczyk *et al.*, 2018)

Table S3:

((NC-IUB), 1986)

**REFERENCES**

(NC-IUB), N.C.o.t.I.U.o.B. (1986). Nomenclature for incompletely specified bases in nucleic acid sequences. Recommendations 1984. Proceedings of the National Academy of Sciences *83*, 4-8.

Calderone, A., Castagnoli, L., and Cesareni, G. (2013). mentha: a resource for browsing integrated protein-interaction networks. Nature Methods *10*, 690-691.

Orchard, S., Ammari, M., Aranda, B., Breuza, L., Briganti, L.*, et al.* (2014). The MIntAct project--IntAct as a common curation platform for 11 molecular interaction databases. Nucleic acids research *42*, D358-363.

Oughtred, R., Stark, C., Breitkreutz, B.-J., Rust, J., Boucher, L.*, et al.* (2018). The BioGRID interaction database: 2019 update. Nucleic Acids Research *47*, D529-D541.

Rolland, T., Taşan, M., Charloteaux, B., Pevzner, Samuel J., Zhong, Q.*, et al.* (2014). A Proteome-Scale Map of the Human Interactome Network. Cell *159*, 1212-1226.

Szklarczyk, D., Gable, A.L., Lyon, D., Junge, A., Wyder, S.*, et al.* (2018). STRING v11: protein–protein association networks with increased coverage, supporting functional discovery in genome-wide experimental datasets. Nucleic Acids Research *47*, D607-D613.

Warde-Farley, D., Donaldson, S.L., Comes, O., Zuberi, K., Badrawi, R.*, et al.* (2010). The GeneMANIA prediction server: biological network integration for gene prioritization and predicting gene function. Nucleic Acids Research *38*, W214-W220.
